# Supplementary material
Source: Springer Nature journal article supplement (https://www.springermedizin.de/resource/supplementary/13054_2013_3006_MOESM5_ESM.docx/9712372)
Supplement: MOESM5 [file 9712372]

Table 2

| **Positive Comments** | - Love it - Helps to ensure vital information is not missed - Helps nurses who might not have done the respiratory module to check the ventilation more closely - Good systems overview - Helps reiterate many plans from ward round - Works well - Mnemonic helps easier learning and improves the memory or recall - Allows for main/key points of care to be addressed on ward round and effective planning - Gives structure indirectly to staff on discussion or key points and guidance for bedside nurse on ward round - Addresses the DNAR status formally on a daily basis |
| --- | --- |
| **Negative Comments** | - Not comprehensive enough - Not always adhered to |
| **Areas for Suggested Development** | - Could be a more generic mnemonic so all valuable information is included for all types of patient, i.e. head, respiratory, orthopedic - Should include ‘S’ for social issues |
